# Supplementary material for: Nanoporous two-dimensional MoS2 membranes for fast saline solution purification
Source: Royal Society of Chemistry journal article supplement (doi:10.1039/c6cp01967f), 2016-01-01
Supplement: c6cp01967f1.pdf [file c6cp01967f1.pdf]

## Electronic Supplementary Information

### Nanoporous Two-Dimensional MoS<sub>2</sub> Membrane for Fast Saline Solution Purification

Jianlong Kou<sup>†,‡</sup>, Jun Yao<sup>†</sup>, Lili Wu<sup>‡</sup>, Xiaoyan Zhou<sup>‡</sup>, Hangjun Lu<sup>‡</sup>, Fengmin Wu<sup>‡</sup>, and Jintu Fan<sup>†</sup>

<sup>†</sup>*State Key Laboratory of Heavy Oil Processing, and School of Petroleum Engineering, China University of Petroleum (East China), Qingdao 266580, China*

<sup>‡</sup>*Institute of Condensed Matter Physics, and Zhejiang Province Key Laboratory of Solid State Optoelectronic Devices, Zhejiang Normal University, Jinhua 321004, China,*

<sup>¶</sup>*Department of Fiber Science and Apparel Design, Cornell University, Ithaca, New York 14853-4401, USA*

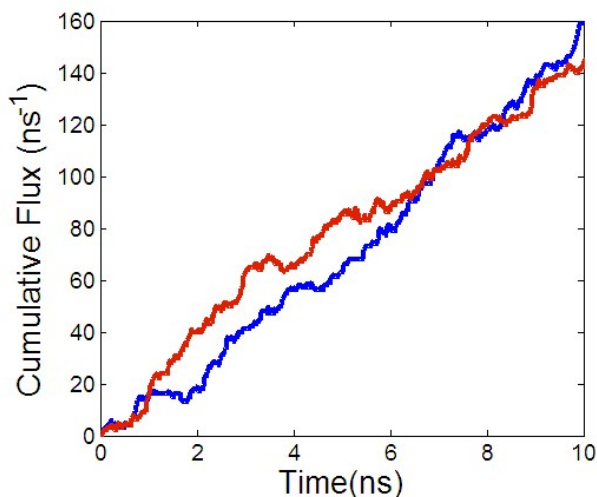

Figure S1. Cumulative water flux through the MoS<sub>2</sub> membrane with both pressure ways of piston (red) and acceleration (blue). As show in the Figure, effect of applying pressure is slight.

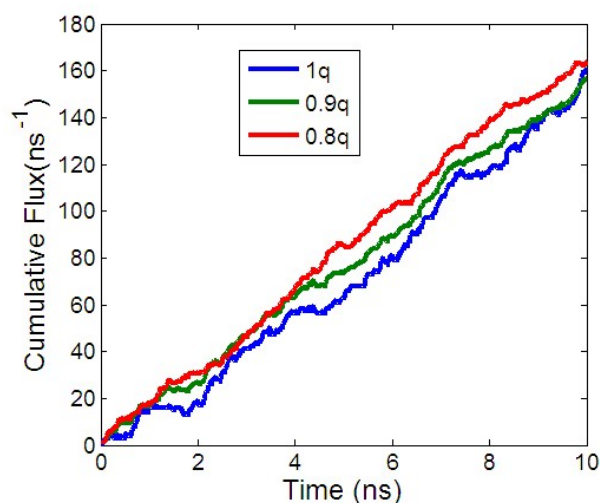

Figure S2. Cumulative water flux through the MoS<sub>2</sub> membrane in different charge densities of edge atoms. Due to the pore, charge density of edge atoms may be reduced.<sup>S1</sup> Charge densities of edge atoms with  $1q$ ,  $0.9q$ , and  $0.8q$  are shown in Figure. We found that the charge effect is a slight.

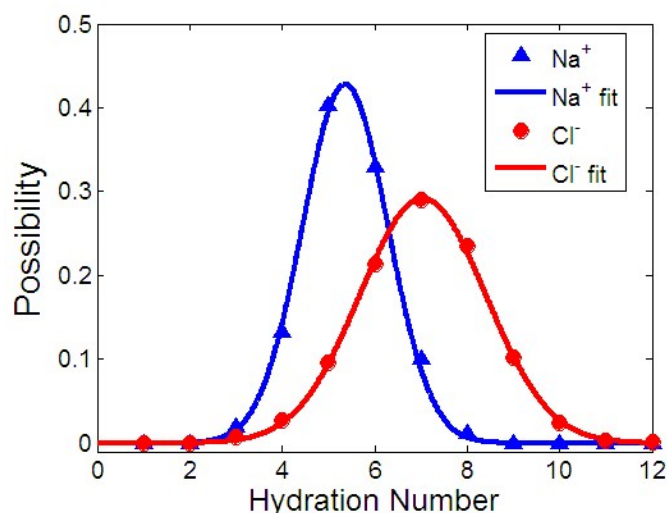

Figure S3. The possible distribution of hydration numbers for Na<sup>+</sup> (blue triangle) and Cl<sup>-</sup> (red circle) in the bulk. Solid lines of Na<sup>+</sup> (blue) and Cl<sup>-</sup> (red) are fitted by Gaussian probability function, respectively. The average coordination numbers of Na<sup>+</sup> and Cl<sup>-</sup> are 5.2 and 7.1, which is consistent with data from X-ray diffraction and simulations.<sup>S2-S7</sup>

## References

- [S1] H. Qiu, T. Xu, Z. Wang, W. Ren, H. Nan, Z. Ni, Q. Chen, S. Yuan, F. Miao, and F. Song. *Nat. Commun.* 2013, **4**, 2642.
- [S2] J. L. Kou, X. Y. Zhou, H. J. Lu, F. M. Wu, and J. T. Fan. *Nanoscale* 2014, **6**, 1865-1870.

- [S3] D. L. Bostick and C. L. Brooks, *Proc. Natl. Acad. Sci. U. S. A.* 2007, **104**, 9260–9265.
- [S4] M. M. Harding, *Acta Crystallogr, Sect. D: Biol. Crystallogr.* 2002, **58**, 872–874.
- [S5] Q. Shao, L. L. Huang, J. Zhou, L. H. Lu, L. Z. Zhang, X. H. Lu, S. Y. Jiang, K. E. Gubbinse and W. F. Shen, *Phys. Chem. Chem. Phys.* 2008, **10**, 1896.
- [S6] X. J. Gong, J. C. Li, K. Xu, J. F. Wang and H. Yang, *J. Am. Chem. Soc.* 2010, **132**, 1873–1877.
- [S7] Z. Michael, W. James and D. V. Massimiliano, *J. Phys.: Condens. Matter* 2010, **22**, 454126.
